# Supplementary material for: VviWRKY40, a WRKY Transcription Factor, Regulates Glycosylated Monoterpenoid Production by VviGT14 in Grape Berry
Source: PubMed Central journal article supplement (PMC7290806; doi:10.3390/genes11050485), 2020-04-29
Supplement: genes-11-00485-s001.pdf [file genes-11-00485-s001.pdf]

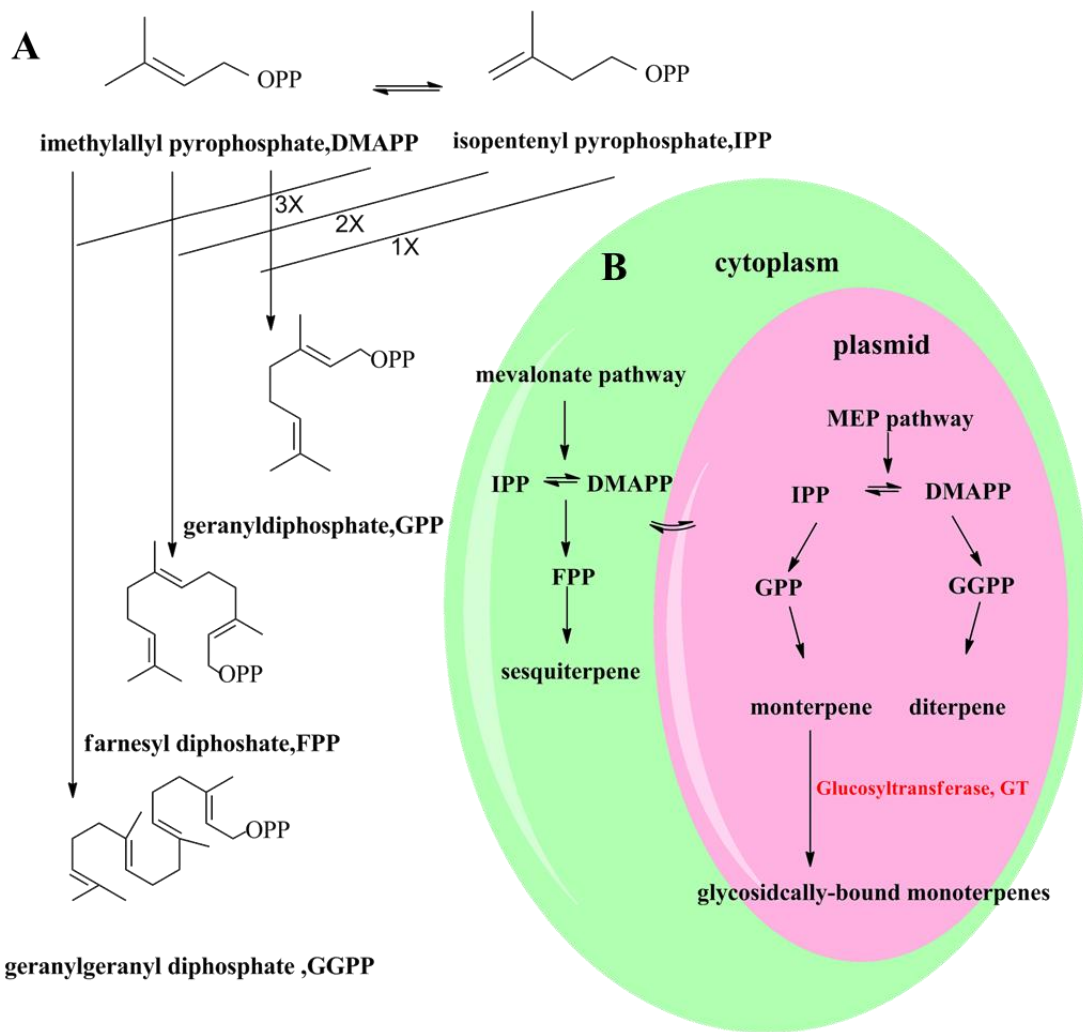

**Supplemental Figure S1. Outline of the terpenes biosynthesis in plants.**

**A.** The synthesis of allylic prenyl diphosphates dimethylallyl diphosphate (DMAPP), geranyl diphosphate (GPP) farnesyl diphosphate (FPP), and geranylgeranyl diphosphate (GGPP) by the action of terpene synthases.

**B.** The schematic diagram of the mevalonate and methylerythritol phosphate (MEP) pathway.

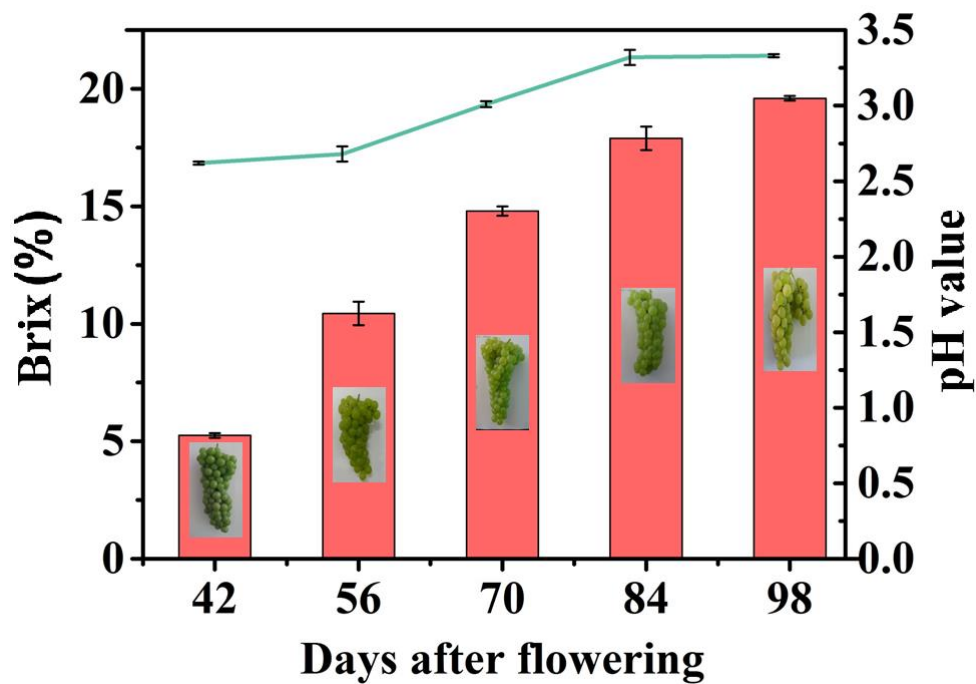

**Supplemental Figure S2.** Changes in the total soluble solid content ( $^{\circ}$ Brix; column) and pH value (line) during the development of *Vitis vinifera* L. ‘Muscat blanc à Petit grain’ grape berries. Data are represented as means  $\pm$ SD of three replicates.

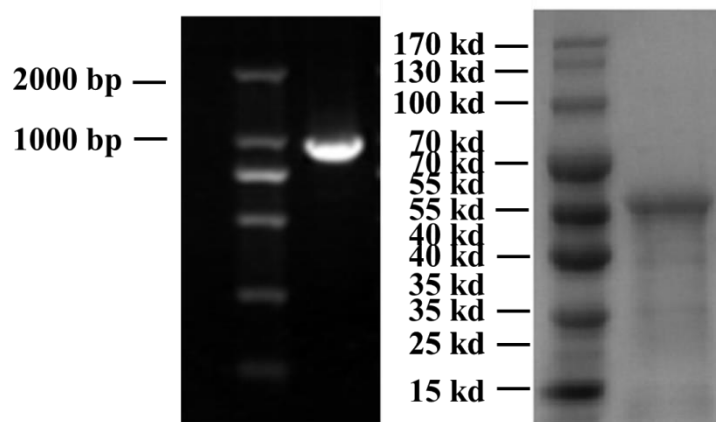

**Supplemental Figure S3.** Agarose gel electrophoresis of *VviWRKY40* coding sequence (left) and sodium dodecylsulfate polyacrylamide gel electrophoresis of the recombinant *VviWRKY40* protein (right)

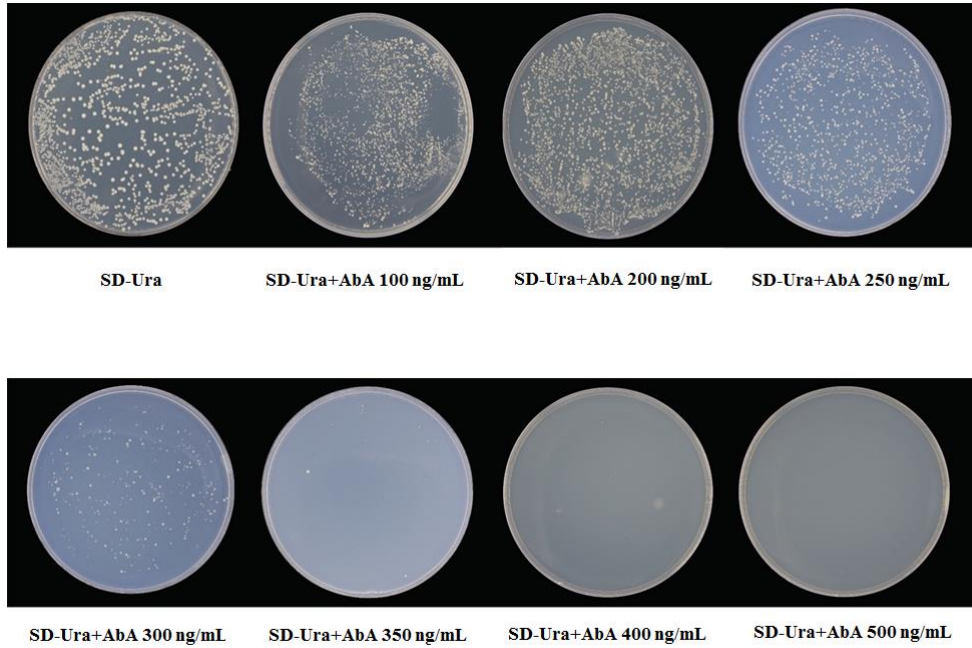

#### **Supplemental Figure S4. Self-activation test of yeast one-hybrid screening**

Yeast cells containing the bait vector pAbAi harboring the three tandem w-box elements were grown on the tryptophan SD medium without uracil (SD-Ura) supplemented with a series of concentrations of Aureobasidin A (AbA). When the concentration of AbA reaches 400 ng/mL, no any yeast grows on the medium, indicating that this AbA concentration can be used to eliminate the background and to test the validation of transcription regulators interaction with three w-box elements.

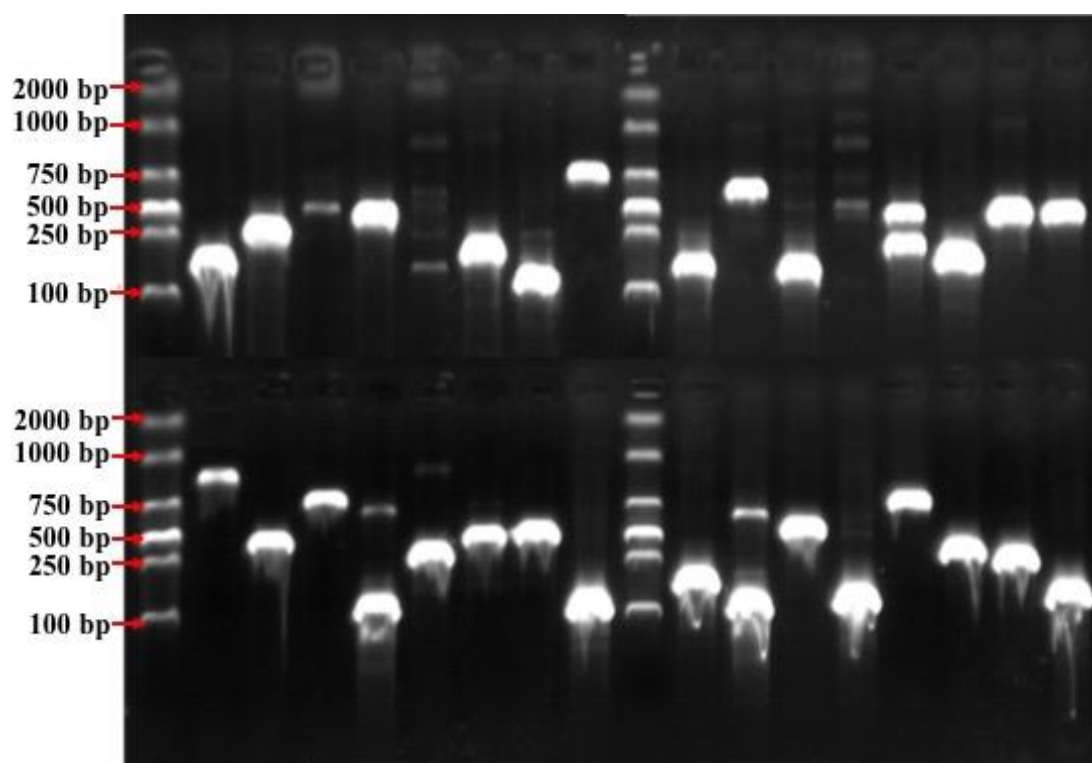

**Supplemental Figure S5. Agarose gel electrophoresis of the PCR products from the clones grown on the yeast-one-hybrid screening media. The primers for PCR are M13-47 and M13-48.**

**Supplemental Table S1. Primers used in this study**

| <b>Gene</b>                     | <b>F</b>                       | <b>R</b>                             | <b>Use in this study</b>       |
|---------------------------------|--------------------------------|--------------------------------------|--------------------------------|
| <b>VviActin</b>                 | 5'-CTTGCATCCCTCAGCACCTT-3'     | 5'-TCCTGTGGACAATGGATGGA-3'           |                                |
| <b>VviUbiquitin</b>             | 5'-GTGGTATTATTGAGCCATCCTT-3'   | 5'-AACCTCCAATCCAGTCATCTAC-3'         |                                |
| <b>VviGAPDH</b>                 | 5'-TTCTCGTTGAGGGCTATTCCA-3'    | 5'-CCACAGACTTCATCGGTGACA-3'          |                                |
| <b>VviGT14</b>                  | 5'-ACCATGGAGTGGAAGCATAGGG-3'   | 5'-TGGAAACAAGGCAGGAAAGGTG-3'         |                                |
| <b>VviWRKY40</b>                | 5'-GCCTGCTTCTGAAGGACGGATAC-3'  | 5'-TGGTGAAGGTTGCTGGTGGTTATG-3'       | Quantitative real-time<br>PCR  |
| <b>VviNCED1</b>                 | 5'-GCAGAGGACGAGAGTGTAAGGA-3'   | 5'-GCAGAGTAAAAACACATGAAGCTAGT-3'     |                                |
| <b>M13-47/48</b>                | 5'-CGCCAGGGTTTTCCCAGTCACGAC-3' | 5'-CACACAGGAAACAGCTATGAC-3'          |                                |
| <b>NbGT</b>                     | 5'-CCGCCGTGTGATGCAGATGC-3'     | 5'-AGTATTGAGCTTGGCGAGCAACTC-3'       |                                |
| <b>NbEF1<math>\alpha</math></b> | 5'-AGCTTTACCTCCCAAGTCATC-3'    | 5'-AGAACGCCTGTCAATCTTGG-3'           |                                |
| <b>VviWRKY4</b>                 | 5'-ATGGCTCAGAATGATACGTCCTCG-3' | 5'-TTACACCGCAATCTGCTCTT-3'           |                                |
| <b>VviWRKY22</b>                | 5'-ATGATGAGCGAGTTTTTGGGC-3'    | 5'-TCAGCAACCGCCGGCGGCAGTT-3'         |                                |
| <b>VviWRKY24</b>                | 5'-ATGGGTTCTTCCTCTGGGAGC-3'    | 5'-CCGGGACAGAGCAGAGACTCGAATAACATG-3' | Cloning of full-length<br>gene |
| <b>VviWRKY26</b>                | 5'-ATGGCTTCCTCTGCTGCTAGTTTT-3' | 5'-TGGTTCTTGAGAAAACCCCATCTGGG-3'     |                                |
| <b>VviWRKY32</b>                | 5'-ATGGCTGGGAACCAGAGCT-3'      | 5'-ACGGCTTGATTTCAAATCCA-3'           |                                |
| <b>VviWRKY41</b>                | 5'-ATGGACACTGGTTTGAAATGGCA-3'  | 5'-CTAGGAGAAAAATCCTGGGGTAT-3'        |                                |

**Supplemental Table S2. Nucleotide sequence of *VviGT14* fragment used in EMSA**

| Name     | Sequence                                           |
|----------|----------------------------------------------------|
| Fragment | AGAAGTGAGAGGGTAAG <b>TTGAC</b> CATGCACTCTCATCTAGAT |

**Note: w-box in the fragment is highlighted in yellow**
